# Supplementary material for: Genome-wide assessment of the population structure and genetic diversity of four Portuguese native sheep breeds
Source: Frontiers journal article supplement (doi:10.3389/fgene.2023.1109490), 2023-01-13
Supplement: Image_2.pdf [file Image_2.pdf]

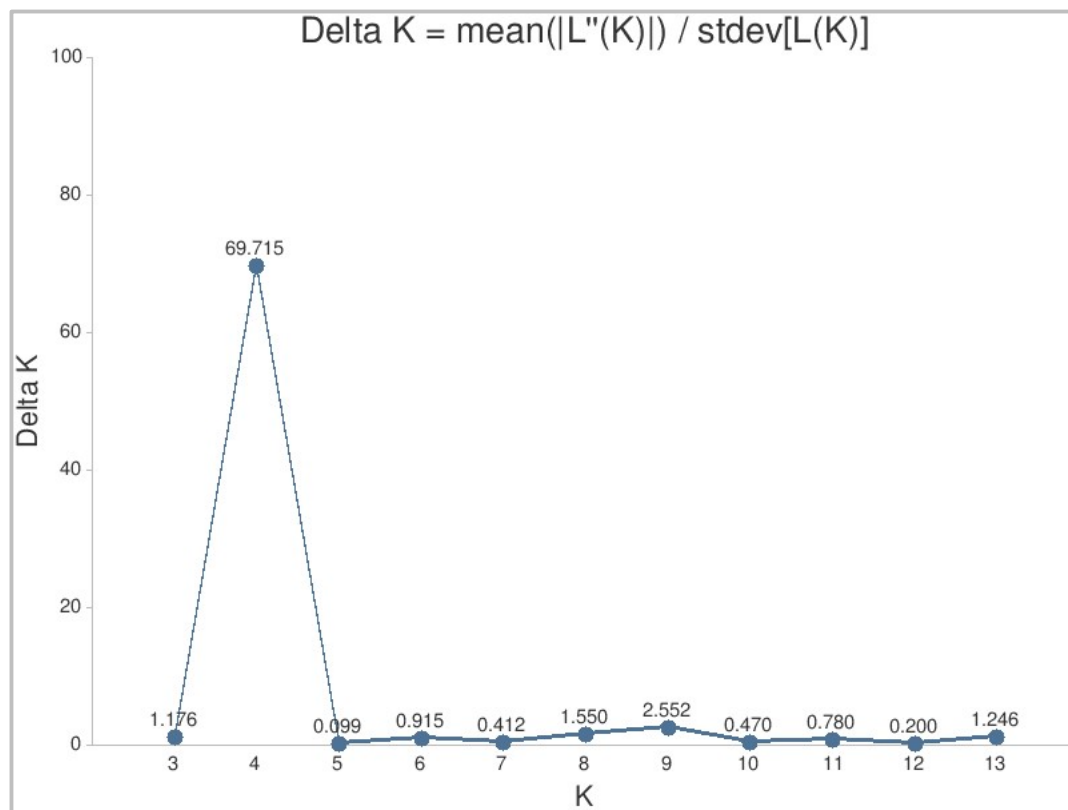

**Figure S2:** Delta K graph obtained with the CLUMPAK software
